# Supplementary material
Source: publisher site journal article supplement (https://www.spandidos-publications.com/1717/downloadSupplementary)

Figure S1. Diagrammatic summary of dynamic T and B cell interaction in the TLS associated with the TME of gastric cancer. Naïve T and B cells are recruited to TLS upon interaction between CD62L, which is expressed on naïve lymphocytes, and PNAd, which is expressed on HEVs. CD4<sup>+</sup> T<sub>h</sub> and T<sub>FH</sub> can promote B cell activation, germinal center formation, and plasma cell differentiation. The plasma cells secrete antibodies and participate in humoral antitumor immune responses. CD4<sup>+</sup> and CD8<sup>+</sup> T cells can also be activated upon engaging tumor-antigen-peptides/MHC presented by DC and become memory or effector T cells. Effector CD8<sup>+</sup> T cells in the TME upregulate PD-1. Based on the results from studies of chronic HIV or LMCV infection, we hypothesize that PD1<sup>+</sup>CD8<sup>+</sup> TILs can be further divided into CXCR5<sup>+</sup> and CXCR5<sup>-</sup> subsets, which are regulated by id2/E2A axis. The CXCR5<sup>+</sup> subset located in the B cell follicle and the germinal center. The follicular CXCR5<sup>+</sup>CD8<sup>+</sup> T cells subset can undergo proliferation and differentiate into the CXCR5<sup>-</sup> subset upon id2 upregulation. Based on previous studies, we further hypothesize that germinal center CXCR5<sup>+</sup>CD8<sup>+</sup> T cells can exert a suppressive effect on germinal B cell responses and inhibit the generation of plasma cells. In contrast, ample evidence has supported the notation that B cells and plasma cells can inhibit CD8<sup>+</sup> T cell-mediated antitumor effect. TME, tumor microenvironment; TLS, tertiary lymphoid structures; SLO, secondary lymphoid organ; APC, antigen presenting cell; FDC, follicular dendritic cells; T<sub>h</sub>, helper T cell; T<sub>FH</sub>, follicular helper T cell; SHM, somatic hypermutation; CRS, class switch recombination; PNAd, Peripheral Node Addressin.

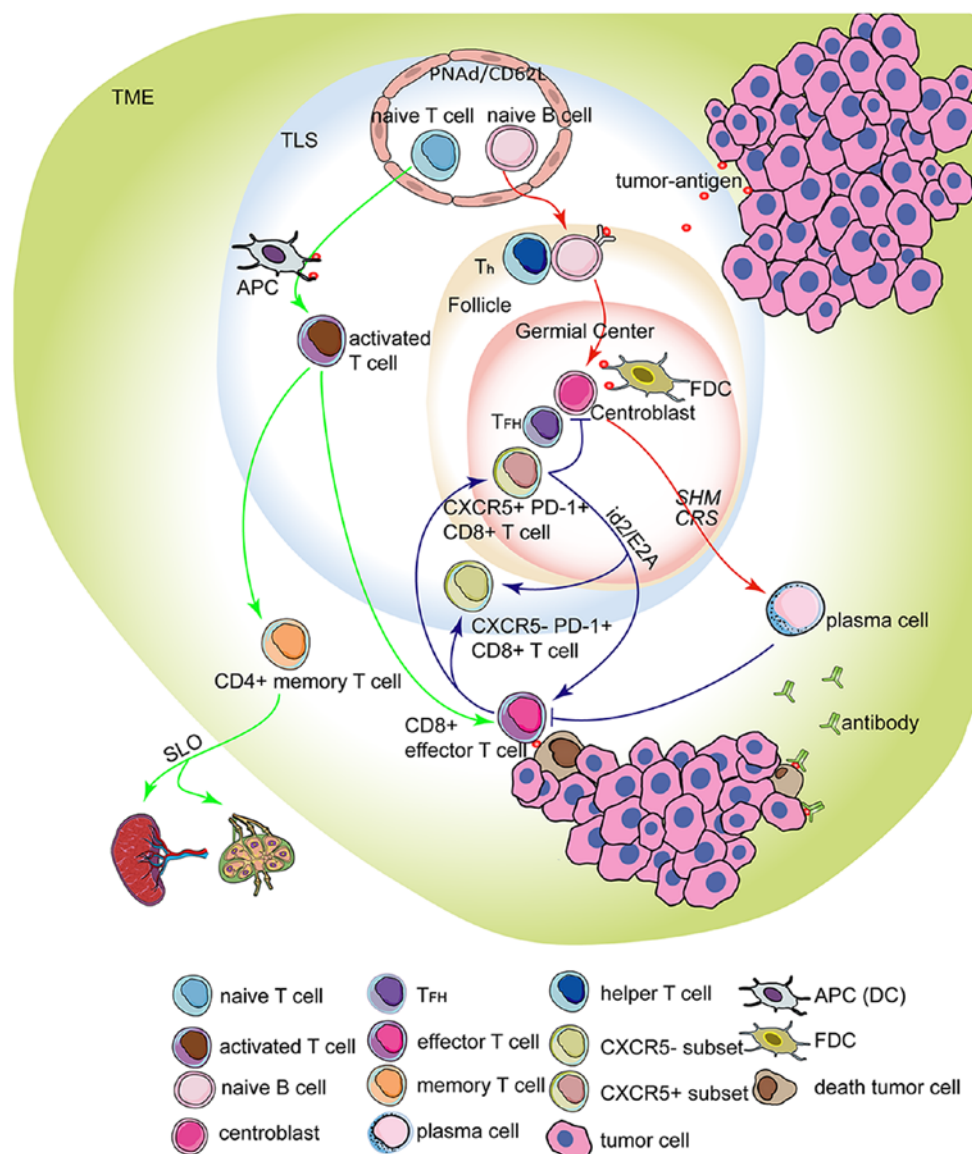

Supplement: Supplementary file 1 [file downloadSupplementary]
